# Supplementary material for: Symbiotic immuno-suppression: is disease susceptibility the price of bleaching resistance?
Source: PeerJ. 2018 Apr 17;6:e4494. doi: 10.7717/peerj.4494 (PMC5909685; doi:10.7717/peerj.4494)
Supplement: Supplemental Information 1 [file peerj-06-4494-s001.xlsx]

## Sheet: monthly observations
		white= white band
		05 sept 14			11 nov 14			21 Jan 15			MARCH 15
genet	ramet	bleaching	disease	mortality	bleaching	disease	mortality	bleaching	disease	mortality	bleaching	disease	mortality
A	1	YES	no	no	no	no	MOST	no	no	MOST	no	no	most
	2	no	no	no	no	no	DEAD	no	no	DEAD			dead
	3	no	no	no	no	no	MOST	no	no	MOST	no	no	most
	4	no	no	no	no	no	DEAD	no	no	dead			dead
	5	YES	no	no	no	no	MOST	no	no	DEAD			dead
	6	no	no	no	no	no	MOST	no	no	DEAD			dead
	7	no	no	no	no	no	MOST	no	white	MOST	no	no	most
	8	no	no	no	no	no	MOST	no	no	MOST			dead
	9	no	no	no	no	no	MOST	no	no	MOST			dead
	10	no	no	no	no	no	MOST	no	no	MOST	no	no	most
B	1	no	white	partial	no	no	most			DEAD			dead
	2	no	white	partial			dead			DEAD			dead
	3	no	white	partial			dead			DEAD			dead
	4	no	white	partial			dead			DEAD			dead
	5	no	white	partial			DEAD			DEAD			dead
	6	no	no	no			DEAD			DEAD			dead
	7	no	no	no			DEAD			DEAD			dead
	8	no	no	no			DEAD			DEAD			dead
	10	no	white				DEAD			DEAD			dead
C	1	NO	NO	NO			DEAD	NO	NO	DEAD			dead
	2	NO	NO	NO			MOST	NO	NO	DEAD			dead
	3	NO	NO	NO			MOST	NO	NO	MOST			dead
	4	NO	NO	NO			DEAD	NO	NO	dead			dead
	5	NO	NO	NO			NO	NO	NO	NO	no	white	most
	6	NO	NO	NO			MOST	NO	NO	MOST		white	most
	7	NO	NO	NO			DEAD			DEAD			dead
	8	NO	NO	NO		WHITE	MOST	NO	NO	MOST	no	white	most
D	1	NO	NO	NO	no	no	DEAD	no	no	dead	no	no	dead
	3	NO	NO	NO	no	no	NO	no	no	no	no	no	no
	5	NO	NO	NO	no	no	NO	no	no	no	no	no	no
	6	NO	NO	NO	no	no	no	no	no	no	no	no	no
	7	no	no	no	no	no	no	no	no	no	no	no	no
	9	NO	NO	NO	no	no	no	no	no	no	no	no	no
	10	NO	NO	NO	no	no	no	no	no	no	no	no	no
E	1	no	no	no	no	no	no	no	no	no	no	no	no
	2	no	no	no	no	no	no	no	no	dead			dead
	3	no	no	no	no	no	no	no	no	dead			dead
	4	no	no	no	no	no	no	no	no	dead			dead
	5	no	no	no	no	no	no	no	no	partial	no	no	partial
	6	no	no	no	no	no	no	no	no	dead			dead
	7	no	no	no	no	no	no	no	no	most	no	no	most
	8	no	no	no	no	no	no	no	no	dead			dead
	9	no	no	no	no	no	no	no	no	dead			dead
	10	no	no	no	no	no	no	no	no	no	no	no	no
F	3	no	no	no	no	no	NO	no	no	mostly	no	no	mostly
	4	no	no	no	no	no	NO	no	no	mostly	no	no	mostly
	5	no	no	no	no	white	partial			dead			dead
G	7	no	white	partial			dead			dead			dead
	8	no	white	partial			dead			dead			dead
	9	no	white	partial			partial			partial			partial
	10	no	white	partial			dead			dead			dead
H	1	no	no	no	no	no	most			dead			dead
	5	no	no	no			dead			dead			dead
	8	no	white	partial			dead			dead			dead
J	2	no	no	no	yes	no	no	yes		no	pale	no	no
	3	no	white	partial			dead			dead			dead
	5	no	white	partial			dead			dead			dead
	6	no	no	no			dead			dead			dead
	7	no	white	partial			dead			dead			dead
	10	yes	no	no	yes	no	no	yes		no	yes	no	no
K	1	no	no	no	no	no	no	no	no	no	no	no	no
	2	no	no	no	no	no	no	no	no	no	no	no	no
	3	no	no	no	no	no	no	no	no	no	no	no	no
	4	no	no	no	no	no	no	no	no	no	no	no	no
	5	no	no	no			dead?			dead			dead
	6	no	no	no	no	no	no	no	no	no	no	no	no
	7	no	no	no	no	no	no	no	no	no	no	no	no
	8	no	no	no	no	no	no	no	no	no	no	no	no
	9	no	no	no	no	no	no	no	no	no	no	no	no
	10	no	no	no	no	no	no	no	no	no	no	no	no
L	1	no	no	no	no	no	no	no	no	no	no	no	no
	2	no	no	no	no	no	partial- bottom- predation?	no	no	partial	no	no	chopped off
	3	no	no	no	no	no	no	no	no	no	no	no	no
	4	no	no	no	no	no	no	no	no	no	no	no	no
	6	no	no	no	no	no	no	no	no	no	no	no	no
	7	no	no	no	no	no	no	no	no	no	no	no	no
	8	no	no	no	no	no	no	no	no	no	no	no	no
	9	no	no	no	no	no	no	no	no	no	no	no	no
	10	no	no	no	no	no	no	no	no	no	no	no	no
M	1	no	no	no	no	no	no	no	no	no	no	no	no
	2	no	no	no	no	no	no	no	no	no	no	no	no
	3	no	no	no	no	no	no	no	no	no	no	no	no
	4	no	no	no	no	no	no	no	no	no	no	no	no
	5	no	no	no	no	no	no	no	no	no	no	no	no
	6	no	no	no	no	no	no	no	no	no	no	no	no
	7	no	no	no	no	no	no	no	no	no	no	no	no
	8	no	no	no	no	no	no	no	no	no	no	no	no
	10	no	no	no	no	no	no	no	no	no	no	no	no
N	6	no	no	no	no	no	no	no	no	no	no	no	no
	7	no	no	no	no	no	no	no	no	no	no	no	no
	8	no	no	no	no	no	no	no	no	no	no	no	no
	9	no	no	no	no	no	no	no	no	no	no	no	no
	10	no	no	no	no	no	no	no	no	no	no	no	no
O	1	no	no	no	no	no	no	no	no	no	no	no	no
	2	no	no	no	no	no	no	no	no	no	no	no	no
	3	no	no	no	no	no	no	no	no	no	no	no	no
	4	no	no	no	no	no	no	no	no	no	no	no	no
	5	no	no	no	no	no	no	no	no	no	no	no	no
	6	no	no	no	no	no	no	no	no	no	no	no	no
	7	no	no	no	no	no	no	no	no	no	no	no	no
	8	no	no	no	no	no	no	no	no	no	no	no	no
	9	no	no	no	no	no	no	no	no	no	no	no	no
	10	no	no	no	no	no	no	no	no	no	no	no	no
P	2	no	no	no	no	no	no	no	no	no	no	no	no
	3	no	no	no	no	no	no	no	no	no	no	no	no
	4	no	no	no	no	no	no	no	no	no	no	no	no
	5	no	no	no	no	no	no	no	no	no	no	no	no
	6	no	no	no	no	no	no	no	no	no	no	no	no
	7	no	no	no	no	no	no	no	no	no	no	no	no
	9	no	no	no	no	no	no	no	no	no	no	no	no
	10	no	no	no	no	no	no	no	no	no	no	no	no
Q	3	no	no	no	no	no	no			fallen off			fallen off
	7	no	no	no	no	no	no	no	no	no			no
	8	no	no	no	no	no	no	no	no	no	no	no	most / chopped off
	9	no	no	no	no	no	no	no	no	most / fallen off	no	no	most/ fallen off
R	1	yes	no	no	yes	no	no	no	no	no	yes	no	no
	2	yes	no	no	yes	no	no	no	no	no	yes	no	partial
	3		no	no	no	no	no	no	no	no	no	white	partial
	5		no	no	no	no	no	no	no	no	no	white	mostly
	6		no	no	no	no	no	no	no	no	no	white	partial
	7		no	no	no	no	no	no	no	no	no	white	partial
	8		no	no	no	no	no	no	no	no	no	white	partial
	9		no	no	no	no	no	no	no	no	no	white	partial
	10	yes	no	no	yes	no	no	no	no	no	yes	no	mostly
S	2	no	no	no	no	no	no	no	no	no	no	no	no
	4	no	no	no	no	no	no	no	no	no	no	no	no
	5	no	no	no	no	no	no	no	no	no	no	no	no
	6	no	no	no	no	no	no	no	no	no	no	no	no
	7	no	no	no	no	no	no	no	no	no	no	no	no
	10	no	no	no	no	no	no	no	no	no	no	white	mostly
T	1	no	no	no	no	no	no	no	no	no	no	no	no
	2	no	no	no	no	no	no	no	no	no	no	no	no
	4	no	no	no	no	no	no	no	no	no	no	no	no
	5	no	no	no	no	no	no	no	no	no	no	no	no
	8	no	no	no	no	no	no	no	no	no	no	no	no
	9	no	no	no	no	no	no	no	no	no	no	no	no
	10	no	no	no	no	no	no	no	no	no	no	no	no
V	1	no	no	no	no	no	no	no	no	no	no	no	no
	2	no	no	no	no	no	no	no	no	no	no	no	chopped
	3	no	no	no	no	no	no	no	no	no	no	no	chopped
	4	no	no	no	no	no	no	no	no	no	no	no	no
	5	no	no	no	no	no	no	no	white	partial	no	no	no
W	1	no	no	no	no	no	no	no	no	no	yes	no	partial
	2	yes	no	no	no	no	partial	no	no	partial	no	white	mostly
	3	yes	no	no	no	no	partial	no	no	partial	yes	no	mostly
	4	yes	no	no	no	no	no	no	no	no	no	no	partial
	5	yes	no	no	no	no	partial	no	no	partial	no	no	partial
	6	no	no	no	no	no	no	no	no	no	no	no	no
	7	no	no	no	no	no	no	no	no	no	no	no	no
	8	no	no	no	no	no	no	no	no	no	no	no	no
	9	no	no	no	no	no	no	no	no	no	yes	no	mostly
	10	no	no	no	no	no	no	no	no	no	yes	no	partial

## Sheet: chi square
chi square analysis						genet	bleaching only	disease	both	neither
Numbers represent ramet designations.						A	1	7		2
So that ramet 5 within genet A is counted as one bleaching only replicate							5			3
										4
										6
										8
										9
										10
						B		1		6
								2		7
								3		8
								4
								5
								10
						C		5		1
								6		2
								8		3
										4
										7
						F		5		3
										4
						G		7
								8
								9
								10
						H		8		1
										5
						J	2	3		6
							10	5
								7
						R	1	3
							2	5
							10	6
								7
								8
								9
						S		10		2
										4
										5
										6
										7
						V		5		1
										2
										3
										4					bleach
						W	1		2	6					yes	no
							3			7			disease	yes	1	27	28
							4			8				no	13	32	45
							5								14	59
							9
							10
	total ramets considered				observed ramets (O)		13	27	1	32
	73				expected %		0.118221	0.310002	0.0735598	0.498217
					expected ramets (E)		8.63014	22.6301	5.36986	36.3699
	% diseased		% bleached			O-E	4.36986	4.36986	-4.36986	-4.36986
	0.383562		0.191781			O-E^2	19.0957	19.0957	19.0957	19.0957
						O-E^2/E	2.21268	0.843817	3.55609	0.525042
						X^2	7.13762
						p= 0.0075
						bleaching and disease are not independent and appear to occurr less frequently together than they should if they were independent

## Sheet: Sheet3
		1= 1 band
		05 sept 14			11 0v 14			21 Jan 15			MARCH 15
genet	ramet	bleaching	disease	mortality	bleaching	disease	mortality	bleaching	disease	mortality	bleaching	disease	mortality
A	1	1	0	0	0	0	MOST	0	0	MOST	0	0	most
	2	0	0	0	0	0	DEAD	0	0	DEAD			dead
	3	0	0	0	0	0	MOST	0	0	MOST	0	0	most
	4	0	0	0	0	0	DEAD	0	0	dead			dead
	5	1	0	0	0	0	MOST	0	0	DEAD			dead
	6	0	0	0	0	0	MOST	0	0	DEAD			dead
	7	0	0	0	0	0	MOST	0	1	MOST	0	0	most
	8	0	0	0	0	0	MOST	0	0	MOST			dead
	9	0	0	0	0	0	MOST	0	0	MOST			dead
	10	0	0	0	0	0	MOST	0	0	MOST	0	0	most
B	1	0	1	partial	0	0	most			DEAD			dead
	2	0	1	partial			dead			DEAD			dead
	3	0	1	partial			dead			DEAD			dead
	4	0	1	partial			dead			DEAD			dead
	5	0	1	partial			DEAD			DEAD			dead
	6	0	0	0			DEAD			DEAD			dead
	7	0	0	0			DEAD			DEAD			dead
	8	0	0	0			DEAD			DEAD			dead
	10	0	1				DEAD			DEAD			dead
C	1	0	0	0			DEAD	0	0	DEAD			dead
	2	0	0	0			MOST	0	0	DEAD			dead
	3	0	0	0			MOST	0	0	MOST			dead
	4	0	0	0			DEAD	0	0	dead			dead
	5	0	0	0			0	0	0	0	0	1	most
	6	0	0	0			MOST	0	0	MOST		1	most
	7	0	0	0			DEAD			DEAD			dead
	8	0	0	0	0	1	MOST	0	0	MOST	0	1	most
D	1	0	0	0	0	0	DEAD	0	0	dead	0	0	dead
	3	0	0	0	0	0	0	0	0	0	0	0	0
	5	0	0	0	0	0	0	0	0	0	0	0	0
	6	0	0	0	0	0	0	0	0	0	0	0	0
	7	0	0	0	0	0	0	0	0	0	0	0	0
	9	0	0	0	0	0	0	0	0	0	0	0	0
	10	0	0	0	0	0	0	0	0	0	0	0	0
E	1	0	0	0	0	0	0	0	0	0	0	0	0
	2	0	0	0	0	0	0	0	0	dead			dead
	3	0	0	0	0	0	0	0	0	dead			dead
	4	0	0	0	0	0	0	0	0	dead			dead
	5	0	0	0	0	0	0	0	0	partial	0	0	partial
	6	0	0	0	0	0	0	0	0	dead			dead
	7	0	0	0	0	0	0	0	0	most	0	0	most
	8	0	0	0	0	0	0	0	0	dead			dead
	9	0	0	0	0	0	0	0	0	dead			dead
	10	0	0	0	0	0	0	0	0	0	0	0	0
F	3	0	0	0	0	0	0	0	0	mostly	0	0	mostly
	4	0	0	0	0	0	0	0	0	mostly	0	0	mostly
	5	0	0	0	0	1	partial			dead			dead
G	7	0	1	partial			dead			dead			dead
	8	0	1	partial			dead			dead			dead
	9	0	1	partial			partial			partial			partial
	10	0	1	partial			dead			dead			dead
H	1	0	0	0	0	0	most			dead			dead
	5	0	0	0			dead			dead			dead
	8	0	1	partial			dead			dead			dead
J	2	0	0	0	1	0	0	1		0	pale	0	0
	3	0	1	partial			dead			dead			dead
	5	0	1	partial			dead			dead			dead
	6	0	0	0			dead			dead			dead
	7	0	1	partial			dead			dead			dead
	10	1	0	0	1	0	0	1		0	1	0	0
K	1	0	0	0	0	0	0	0	0	0	0	0	0
	2	0	0	0	0	0	0	0	0	0	0	0	0
	3	0	0	0	0	0	0	0	0	0	0	0	0
	4	0	0	0	0	0	0	0	0	0	0	0	0
	5	0	0	0			dead?			dead			dead
	6	0	0	0	0	0	0	0	0	0	0	0	0
	7	0	0	0	0	0	0	0	0	0	0	0	0
	8	0	0	0	0	0	0	0	0	0	0	0	0
	9	0	0	0	0	0	0	0	0	0	0	0	0
	10	0	0	0	0	0	0	0	0	0	0	0	0
L	1	0	0	0	0	0	0	0	0	0	0	0	0
	2	0	0	0	0	0	partial- bottom- predation?	0	0	partial	0	0	chopped off
	3	0	0	0	0	0	0	0	0	0	0	0	0
	4	0	0	0	0	0	0	0	0	0	0	0	0
	6	0	0	0	0	0	0	0	0	0	0	0	0
	7	0	0	0	0	0	0	0	0	0	0	0	0
	8	0	0	0	0	0	0	0	0	0	0	0	0
	9	0	0	0	0	0	0	0	0	0	0	0	0
	10	0	0	0	0	0	0	0	0	0	0	0	0
M	1	0	0	0	0	0	0	0	0	0	0	0	0
	2	0	0	0	0	0	0	0	0	0	0	0	0
	3	0	0	0	0	0	0	0	0	0	0	0	0
	4	0	0	0	0	0	0	0	0	0	0	0	0
	5	0	0	0	0	0	0	0	0	0	0	0	0
	6	0	0	0	0	0	0	0	0	0	0	0	0
	7	0	0	0	0	0	0	0	0	0	0	0	0
	8	0	0	0	0	0	0	0	0	0	0	0	0
	10	0	0	0	0	0	0	0	0	0	0	0	0
N	6	0	0	0	0	0	0	0	0	0	0	0	0
	7	0	0	0	0	0	0	0	0	0	0	0	0
	8	0	0	0	0	0	0	0	0	0	0	0	0
	9	0	0	0	0	0	0	0	0	0	0	0	0
	10	0	0	0	0	0	0	0	0	0	0	0	0
O	1	0	0	0	0	0	0	0	0	0	0	0	0
	2	0	0	0	0	0	0	0	0	0	0	0	0
	3	0	0	0	0	0	0	0	0	0	0	0	0
	4	0	0	0	0	0	0	0	0	0	0	0	0
	5	0	0	0	0	0	0	0	0	0	0	0	0
	6	0	0	0	0	0	0	0	0	0	0	0	0
	7	0	0	0	0	0	0	0	0	0	0	0	0
	8	0	0	0	0	0	0	0	0	0	0	0	0
	9	0	0	0	0	0	0	0	0	0	0	0	0
	10	0	0	0	0	0	0	0	0	0	0	0	0
P	2	0	0	0	0	0	0	0	0	0	0	0	0
	3	0	0	0	0	0	0	0	0	0	0	0	0
	4	0	0	0	0	0	0	0	0	0	0	0	0
	5	0	0	0	0	0	0	0	0	0	0	0	0
	6	0	0	0	0	0	0	0	0	0	0	0	0
	7	0	0	0	0	0	0	0	0	0	0	0	0
	9	0	0	0	0	0	0	0	0	0	0	0	0
	10	0	0	0	0	0	0	0	0	0	0	0	0
Q	3	0	0	0	0	0	0			fallen off			fallen off
	7	0	0	0	0	0	0	0	0	0			0
	8	0	0	0	0	0	0	0	0	0	0	0	most / chopped off
	9	0	0	0	0	0	0	0	0	most / fallen off	0	0	most/ fallen off
R	1	1	0	0	1	0	0	0	0	0	1	0	0
	2	1	0	0	1	0	0	0	0	0	1	0	partial
	3	0	0	0	0	0	0	0	0	0	0	1	partial
	5	0	0	0	0	0	0	0	0	0	0	1	mostly
	6	0	0	0	0	0	0	0	0	0	0	1	partial
	7	0	0	0	0	0	0	0	0	0	0	1	partial
	8	0	0	0	0	0	0	0	0	0	0	1	partial
	9	0	0	0	0	0	0	0	0	0	0	1	partial
	10	1	0	0	1	0	0	0	0	0	1	0	mostly
S	2	0	0	0	0	0	0	0	0	0	0	0	0
	4	0	0	0	0	0	0	0	0	0	0	0	0
	5	0	0	0	0	0	0	0	0	0	0	0	0
	6	0	0	0	0	0	0	0	0	0	0	0	0
	7	0	0	0	0	0	0	0	0	0	0	0	0
	10	0	0	0	0	0	0	0	0	0	0	1	mostly
T	1	0	0	0	0	0	0	0	0	0	0	0	0
	2	0	0	0	0	0	0	0	0	0	0	0	0
	4	0	0	0	0	0	0	0	0	0	0	0	0
	5	0	0	0	0	0	0	0	0	0	0	0	0
	8	0	0	0	0	0	0	0	0	0	0	0	0
	9	0	0	0	0	0	0	0	0	0	0	0	0
	10	0	0	0	0	0	0	0	0	0	0	0	0
V	1	0	0	0	0	0	0	0	0	0	0	0	0
	2	0	0	0	0	0	0	0	0	0	0	0	chopped
	3	0	0	0	0	0	0	0	0	0	0	0	chopped
	4	0	0	0	0	0	0	0	0	0	0	0	0
	5	0	0	0	0	0	0	0	1	partial	0	0	0
W	1	0	0	0	0	0	0	0	0	0	1	0	partial
	2	1	0	0	0	0	partial	0	0	partial	0	1	mostly
	3	1	0	0	0	0	partial	0	0	partial	1	0	mostly
	4	1	0	0	0	0	0	0	0	0	0	0	partial
	5	1	0	0	0	0	partial	0	0	partial	0	0	partial
	6	0	0	0	0	0	0	0	0	0	0	0	0
	7	0	0	0	0	0	0	0	0	0	0	0	0
	8	0	0	0	0	0	0	0	0	0	0	0	0
	9	0	0	0	0	0	0	0	0	0	1	0	mostly
	10	0	0	0	0	0	0	0	0	0	1	0	partial
	this file	10	14		5	2		2	2		8	11
	paper	9	14		4	1		2	2		8	11
	final *what we want to update to*	10	14		5	2		2	2		8	11
